# Supplementary material for: Relationships Among Arsenic-Related Traits, Including Rice Grain Arsenic Concentration and Straighthead Resistance, as Revealed by Genome-Wide Association
Source: Frontiers journal article supplement (doi:10.3389/fgene.2021.787767), 2022-03-14
Supplement: Table_1.xlsx [file Table_1.xlsx]

## Sheet: GWA trait data
Supplementary Table S1 List of the 167 Rice Minicore Accessions and trait data used in the Pinson et al. GWA of arsenic-related traits.
					Trait data used for QTL identification via GWA analysis
Rice Minicore Accession identity	Subspecies: indica or japonica	Subpopu-lation Group, or Admix	Accession Name	Country of origin	StHD_2015_Lsmean_2reps	StHD_2016_Lsmean_4reps	StHD_2yr_LSmean	DHDmsma_LSmean	DHDnative_LSmean	LeafHeightMSMA_LSmean	LeafHeightNative_LSmean	Si_BmntTX_2yr_BLUP	Si_StgtAR_2yr_BLUP	Si_2Locn2Yr_BLUP	As_Flood_Log_2yr_TX_BLUP	P_Flood_Log_2yr_TX_BLUP	S_Flood_Log_2yr_TX_BLUP	Ca_Flood_Log_2yr_TX_BLUP	Cu_Flood_Log_2yr_TX_BLUP
GSOR310219		ARO	Red Khosha Cerma	Afghanistan	8.5	6.5	8.1	87.5	84	106	128	159.826	188.249	175.79	-0.0419537	3.58702	3.062	2.15403	0.422819
GSOR310724		ARO	Ak Tokhum	Azerbaijan	7	6.125	7.1625	84.75	74	93	97.6667	196.872	212.114	204.252	-0.103227	3.57996	3.07375	2.06966	0.42322
GSOR310958		ARO	2	Afghanistan	8	5.875	7.5375	89.75	87	113	126	213.849	238.044	224.258	-0.080846	3.57785	3.08824	2.0916	0.396694
GSOR311206		ARO	79	Guyana	8.5	6.875	8.2875	99	94	122	156	172.375	205.072	189.489	-0.0373203	3.57225	3.06153	2.09629	0.511764
GSOR311327		ARO	Gasym Hany	Azerbaijan	7	4.875	6.5375	69.75	69	83.1667	83	173.558	221.166	197.518	-0.147644	3.58106	3.08315	2.07653	0.444578
GSOR311769		ARO	Pakkali	Philippines				145	135		126				-0.167747	3.61259	3.06834	2.18981	0.439553
GSOR310220	indica	AUS	Safut Khosha	Afghanistan	7.5	5.625	7.1625	87	83	110	131	183.825	210.683	197.467	-0.0686202	3.61709	3.06629	2.213	0.515116
GSOR310317	indica	AUS	IARI 6626	India	7	5.75	6.975	74.75	72	96.6667	104	239.114	232.068	233.336	-0.0762992	3.57039	3.03779	2.17414	0.479448
GSOR310381	indica	AUS	NC 1/536	Pakistan	7	5.5	6.85	83.75	83	119	126	186.943	215.324	201.084	-0.126969	3.59605	3.06042	2.06088	0.484144
GSOR310399	indica	AUS	Doble Carolina	Uruguay	7.5	5.75	7.225	90	88	117.5	123	192.771	223.705	207.711	-0.0884999	3.58194	3.06467	2.1106	0.390023
GSOR310471	indica	AUS	PATNAI 6	Myanmar	7	6.625	7.4125	89.75	87	113	126	166.948	218.833	193.334	-0.0024607	3.60669	3.07378	2.12532	0.438365
GSOR310703	indica	AUS	N-2703	Nepal	8.5	5.75	7.725	93.25	88	143.5	132	225.84	232.673	227.39	0.0096132	3.57252	3.0642	2.15916	0.468397
GSOR310714	indica	AUS	TCHAMPA	Iran	7	6.5	7.35	83.25	83	110.5	136	168.553	226.522	197.657	-0.0434855	3.56078	3.07336	2.11997	0.481589
GSOR310715	indica	AUS	PHUDUGEY	Bhutan	8.5	6.75	8.225	89	84	121	118	200.401	263.789	229.905	-0.0346367	3.55907	3.07255	2.20139	0.411714
GSOR310945	indica	AUS	Dular	India	6	5.83333	6.51667	77.75	70	114	111.333	213.383	255.061	231.942	-0.0332368	3.57848	3.07415	2.11491	0.445049
GSOR311046	indica	AUS	IARI 6621	India	7	6	7.1	84.5	83	116.5	136	237.674	256.723	244.111	-0.0943932	3.55318	3.07186	2.16001	0.47625
GSOR311100	indica	AUS	ARC 6578	India	6.5	5.875	6.7875	86	85	129	128	208.304	229.732	217.797	-0.0596464	3.56286	3.03933	2.17261	0.412656
GSOR311111	indica	AUS	99216	India	7	4.75	6.475	85.25	84	104	105	201.361	229.196	214.291	-0.0226959	3.56532	3.03443	2.24029	0.42631
GSOR311141	indica	AUS	SORNAVARI	Mali	7	7	7.6	103.75	108	115	140	221.703	235.25	226.645	-0.0018378	3.57182	3.07176	2.138	0.486906
GSOR311181	indica	AUS	Tauli	Nepal								176.027	231.51	203.48	-0.156817	3.57537	3.06702	2.08051	0.511133
GSOR311188	indica	AUS	Dara	Indonesia	7	7.125	7.6625	91.5	84	109	153	184.516	233.241	208.267	-0.0167941	3.59555	3.02963	2.17836	0.458943
GSOR311255	indica	AUS	Saraya	Fiji	7	5.5	6.85	78.75	70	94.5	118	196.319	228.67	211.681	-0.163019	3.57337	3.07124	2.14682	0.49729
GSOR311278	indica	AUS	Montakcl	Egypt	8	7	8.1	119.25	113	132	146	206.8	184.328	196.006	0.0629687	3.59729	3.09143	2.07336	0.361889
GSOR311544	indica	AUS	Gallawa	Sri Lanka								173.248	232.249	202.519	-0.0074028	3.57329	3.0183	2.06195	0.523196
GSOR311545	indica	AUS	Ittikulama	Sri Lanka								184.918	237.328	210.353	-0.012252	3.58182	3.04729	2.11659	0.537509
GSOR311547	indica	AUS	Karayal	Sri Lanka								173.494	217.194	195.644	0.0099739	3.59588	3.06535	2.0582	0.528242
GSOR311561	indica	AUS	Nang Bang Bentre	Vietnam								197.576	229.478	212.646	-0.0661047	3.57901	3.0719	2.08491	0.515318
GSOR311572	indica	AUS	DJ 24	Bangladesh								176.886	217.448	197.353	-0.0604863	3.59189	3.06055	2.1787	0.497407
GSOR311573	indica	AUS	DJ 102	Bangladesh								176.155	220.611	198.479	-0.0193271	3.58605	3.04172	2.05942	0.450291
GSOR311576	indica	AUS	DNJ 121	Bangladesh								178.98	208.328	194.1	-0.100855	3.57529	3.04668	2.10175	0.427151
GSOR311592	indica	AUS	UZ ROS 7-13	Uzbekistan								156.718	217.887	188.095	-0.0369	3.58818	3.09237	2.14148	0.489958
GSOR311596	indica	AUS	SL 22-620	Sierra Leone								179.565	200.87	190.911	-0.0743475	3.6011	3.07926	2.06249	0.446306
GSOR311644	indica	AUS	P 35	India								168.416	219.041	194.119	-0.0225455	3.59211	3.09928	2.17379	0.577302
GSOR311654	indica	AUS	CAROLINO 164	Chad								174.061	220.08	197.25	-0.135434	3.5737	3.04897	2.08656	0.597133
GSOR311656	indica	AUS	ASWINA 330	Bangladesh								153.07	199.531	177.859	0.0081211	3.59153	3.10076	2.10798	0.51785
GSOR311765	indica	AUS	Pa Boup	Sierra Leone								206.101	244.555	223.647	0.202457	3.53755	3.03749	2.17665	0.423254
GSOR310598		AUS/(Admix)	Red	Pakistan	7	6.75	7.475	102.75	94	110	162	236.376	211.117	222.322	0.0473519	3.58912	3.08157	2.2312	0.359469
GSOR310100	indica	IND	Ao Chiu 2 Hao	China	7	7.125	7.6625	105.5	104	110	120	203.441	204.957	204.01	-0.12495	3.58583	3.09821	2.15089	0.482176
GSOR310134	indica	IND	BERLIN	Costa Rica	7	6.125	7.1625	120.25	117	152	158	236.006	238.575	234.9	0.0041918	3.56819	3.08853	2.06106	0.453382
GSOR310200	indica	IND	Chin Chin	Panama	8	7.125	8.1625	98.25	96	115.5	131	211.417	237.513	222.871	-0.024632	3.61593	3.07764	2.19926	0.520424
GSOR310389	indica	IND	Won Son Zo No. 11	Korea	7	5.625	6.9125	83.5	83	104.5	162	151.324	197.245	175.978	-0.0593606	3.57361	3.09803	2.11339	0.504317
GSOR310415	indica	IND	Ai Chueh Ta Pai Ku	Taiwan	8.5	7.25	8.475	81.75	83	95	117	184.214	231.602	207.364	-0.0986156	3.55725	3.12097	2.09996	0.464604
GSOR310420	indica	IND	Thang 10	Vietnam	7	7.75	7.975	104.5	95	113.5	154	169.143	197.291	184.359	0.0874195	3.60024	3.05979	2.16266	0.409142
GSOR310440	indica	IND	TJ	Guyana	8.5	6.75	8.225	83.75	83	121.5	139	189.91	243.701	215.655	-0.0034055	3.6028	3.05672	2.15177	0.489828
GSOR310442	indica	IND	PD 46	Sri Lanka	7	5.875	7.0375	74.5	73	113.333	124	207.376	252.059	227.731	-0.0470592	3.57828	3.05555	2.16399	0.504658
GSOR310475	indica	IND	K8C-263-3	Suriname	7	5.375	6.7875	102.5	101	139	158	217.771	175.887	197.233	-0.0091422	3.58933	3.069	2.12787	0.434454
GSOR310480	indica	IND	Djimoron	Guinea	4.5	5.25	5.475	72	70	114	112.667	186.106	218.995	202.397	-0.0333448	3.60477	3.08247	2.10316	0.479341
GSOR310481	indica	IND	Anandi	India	7.5	7.66667	8.18333	135	114	121.5	134	187.976	167.621	179.416	-0.0661496	3.60459	3.08565	2.08618	0.49657
GSOR310489	indica	IND	Chun 118-33	China	8.5	6.16667	7.93333	97.75	95	117.5	128	175.606	197.776	187.617	0.0743639	3.61426	3.10844	2.12857	0.438
GSOR310515	indica	IND	Nam Dawk Mai	Thailand	7	5.875	7.0375	86.25	83	109.5	131	179.707	227.353	203.276	-0.155024	3.59556	3.05623	2.13697	0.502655
GSOR310519	indica	IND	GUYANE 1	Chad	9	6.75	8.475	115.5	111	136	122	183.697	161.063	174.363	0.151331	3.60878	3.09327	2.10221	0.448293
GSOR310546	indica	IND	MAHSURI	Malaysia	8	8.33333	8.76667	135	135	103.5	102	173.856	179.974	178.528	-0.0712142	3.62453	3.07828	2.12326	0.42448
GSOR310566	indica	IND	INIAP 7	Ecuador	8	5.875	7.5375	102	97	89	102	175.606	175.148	177.108	-0.0291505	3.5921	3.10164	2.07447	0.459827
GSOR310630	indica	IND	BKN 6987-68-14	Thailand	5		3.85	106.5	104	72.5	79	202.485	198.745	200.677	-0.0537933	3.57594	3.10755	2.0528	0.56487
GSOR310632	indica	IND	IR 4482-5-3-9-5	Philippines	8.5	7.125	8.4125	125.5	113	95	97				-0.0655751	3.61412	3.04945	2.21144	0.514927
GSOR310693	indica	IND	Bakiella 1	Sri Lanka	7	6.125	7.1625	100.25	101	147.5	160	205.324	201.193	203.145	-0.0359681	3.61009	3.08626	2.27772	0.480956
GSOR310773	indica	IND	ECIA76-S89-1	Cuba	7	5.5	6.85	89.75	89	88.5	93	192.41	226.268	208.732	-0.0968973	3.56827	3.10311	2.12679	0.490683
GSOR310788	indica	IND	Toga	India	8.5	7	8.35	104.5	96	134.5	176	219.787	197.739	208.327	0.22368	3.59456	3.11127	2.13925	0.392633
GSOR310791	indica	IND	Kin Shan Zim	China	5.5	4.25	5.475	70	70	115.667	111.333	193.727	214.446	203.86	-0.0425561	3.59479	3.07137	2.19619	0.519631
GSOR310846	indica	IND	Kao Chio Lin Chou	Taiwan	8	6.5	7.85	86	83	112	134	173.801	200.353	187.966	0.0295788	3.57895	3.0976	2.14647	0.488263
GSOR310849	indica	IND	Pan Ju	China	7	6.625	7.4125	82.25	83	114.5	127	182.239	224.537	203.156	0.0216422	3.58465	3.07688	2.14979	0.437492
GSOR310901	indica	IND	Juppa	Nepal	8		8	137.5	135	105	132				-0.0041411	3.59557	3.03979	2.2052	0.398994
GSOR311016	indica	IND	IR 238	Philippines	7	7.25	7.725	87.75	83	77	82	173.257	219.942	196.808	-0.14354	3.60298	3.05431	2.10725	0.464724
GSOR311105	indica	IND	Hsin Hsing Pai Ku	Taiwan	8	6.75	7.975	83.5	83	107	130	172.32	221.904	197.28	-0.0494995	3.59873	3.06511	2.13208	0.456873
GSOR311113	indica	IND	Shui Ya Jien	Hong Kong	7	5.33333	6.76667	101	96	125.5	113	197.941	228.208	212.228	-0.140114	3.58451	3.07737	2.12649	0.519171
GSOR311117	indica	IND	Tranoeup Beykher	Cambodia	7	7	7.6	137.5	135	109	122				-0.0849484	3.61032	3.04866	2.17451	0.425666
GSOR311123	indica	IND	10340	Italy	7	5.5	6.85	71.75	70	99.8333	108.333	173.572	215.024	194.672	-0.110518	3.57994	3.06935	2.13259	0.4556
GSOR311140	indica	IND	AKP 4	India	3.5	3.625	4.1625	61.5	61	92.1667	97.6667	189.645	217.333	203.285	-0.122618	3.59656	3.06484	2.15436	0.54467
GSOR311151	indica	IND	TD 70	Thailand	7.5	4.75	6.725	87.5	85	128.5	125	200.072	255.13	225.73	-0.107339	3.5486	3.09742	2.13058	0.431385
GSOR311153	indica	IND	IR 2061-214-2-3	Philippines	3	3.75	3.975	76.5	76	84	81	183.784	237.444	209.875	-0.120844	3.56986	3.07167	2.11691	0.525162
GSOR311167	indica	IND	TAINUNG 45	Taiwan	6	6.375	6.7875	122.5	123	125	174	171.735	191.403	182.841	-0.14344	3.61962	3.09435	2.03078	0.46422
GSOR311236	indica	IND	B805D-MR-16-8-3	Indonesia	8	6	7.6	112	112	88.5	82	187.24	183.479	186.435	0.0102607	3.60764	3.08745	2.07144	0.443591
GSOR311266	indica	IND	CO 13	India	8.5	6.66667	8.18333	126.25	126	114	133	176.598	190.225	184.576	-0.0027801	3.5948	3.05001	2.20413	0.457848
GSOR311286	indica	IND	UZ ROS 59	Uzbekistan	7	6.5	7.35	85.75	85	115.5	98	180.415	228.877	204.316	-0.143408	3.58584	3.06565	2.12251	0.505565
GSOR311417	indica	IND	CNTLR80076-44-1-1-1	Thailand	6.5	6	6.85	91.75	89	99	90.7778	167.968	224.098	196.257	-0.0480172	3.58391	3.05714	2.11944	0.523952
GSOR311423	indica	IND	IR 58614-B-B-8-2	Philippines	6.5	4.375	6.0375	90.25	87	84	98	156.755	214.123	186.364	-0.134747	3.58015	3.08215	2.12378	0.52617
GSOR311435	indica	IND	CM1_ HAIPONG	Vietnam	7	6.75	7.475	99.75	103	85	91	184.488	206.688	195.923	-0.0646381	3.59819	3.11108	2.15519	0.448412
GSOR311466	indica	IND	KECHENGNUO NO. 4	China	8.5	7	8.35	86.25	86	105	93	190.111	240.953	214.473	-0.187626	3.58093	3.09429	2.08241	0.533928
GSOR311483	indica	IND	4484	China	7.5	2.25	5.475	87.5	86	87.5	99	164.064	213.2	189.365	-0.067235	3.61755	3.10196	2.03038	0.489879
GSOR311491	indica	IND	YOU-I B	China	2.6	4.33333	4.06667	62.5	61	64.3333	70.4444	196.881	226.841	211.095	-0.345283	3.55056	3.09373	2.10124	0.570219
GSOR311554	indica	IND	Srav Prapay	Cambodia								152.417	226.222	189.948	-0.0696734	3.59255	3.10053	2.07254	0.530819
GSOR311606	indica	IND	Dhan	Nepal											-0.0729283	3.5927	3.09719	2.23088	0.431026
GSOR311635	indica	IND	AMANE	Sri Lanka								184.923	217.379	201.091	-0.0500715	3.62578	3.0706	2.08888	0.539374
GSOR311713	indica	IND	Sereno	Jamaica	7	6.25	7.225	104	117	103.667	162	226.315	249.866	235.597	-0.0868977	3.58875	3.0889	2.01968	0.461314
GSOR311725	indica	IND	A 36-3	Myanmar	8	6.5	7.85	131	135	97.5	133	206.951	217.61	211.533	0.168659	3.61245	3.06621	2.18036	0.424744
GSOR311734	indica	IND	ARC 10633	India								228.541	226.222	225.661	0.0373181	3.60103	3.0716	2.1913	0.469751
GSOR311741	indica	IND	SOC NAU	Vietnam	9	9	9	145	145						-0.200786	3.62509	3.07202	2.15898	0.38967
GSOR311744	indica	IND	Heo Trang	Vietnam	8	6.625	7.9125	108.75	107	127	148	184.26	202.394	193.821	-0.0349131	3.60138	3.05109	2.09886	0.407096
GSOR311745	indica	IND	WONG CHIM	Hong Kong	8.5	9	9	145.25	135	111	122				-0.212077	3.62246	3.05301	2.17354	0.560119
GSOR311781	indica	IND	Krachek Chap	Indochina
GSOR311793	indica	IND	IR64	Philippines	7.5	6	7.35	91.75	88	84	81	154.986	192.765	175.616
GSOR310503	indica	IND/AUS	Manga Kely 694	Madagascar	9	7.66667	8.5	110.75	96	110	142	150.218	205.695	179.384	-0.0528529	3.57402	3.09112	2.11272	0.461989
GSOR310910	indica	IND/AUS	TAINO 38	Taiwan	7.5	6.125	7.4125	95.25	95	108	129	216.894	209.81	212.575	-0.0890383	3.56755	3.0683	2.17166	0.452266
GSOR311173	indica	IND/AUS	Manga 629	Madagascar	9	8	9	112.5	103	112.5	149	176.644	197.937	188.179	0.128495	3.62335	3.06085	2.10128	0.443351
GSOR311269	indica	IND/AUS	Shimla Early	Iraq	8	7.25	8.225	108	104	132.5	164	222.294	216.788	213.706	0.0049855	3.5752	3.03971	2.15876	0.357378
GSOR311669	indica	IND/AUS	JP 5	Pakistan								146.625	219.341	184.035	0.103114	3.6305	3.06548	2.10604	0.429109
GSOR310494		IND/TRJ	WW 8/2290	Netherlands	4.5	4.33333	5.01667	107	135	100	114	175.702	199.438	188.434	-0.0006016	3.58702	3.1255	2.01351	0.491539
GSOR311281		IND/TRJ	A 152	Bangladesh	7.5	7.66667	8.18333	107.5	88	96.5	110	217.246	244.855	229.015	0.0500774	3.5797	3.07179	2.07073	0.46602
GSOR310111	japonica	TEJ	Bombilla	Spain	7	5.66667	6.93333	74.25	70	69.1667	76	207.683	224.329	214.996	-0.0870605	3.58818	3.03521	2.13457	0.532136
GSOR310161	japonica	TEJ	SHIMIZU MOCHI	Japan	6.5	4.125	5.9125	68.5	69	79.3333	123.333	179.058	231.856	205.063	-0.0547792	3.60342	3.02935	2.04616	0.560861
GSOR310204	japonica	TEJ	Italica Carolina	Poland	6	5.125	6.1625	53.5	52	68.6667	70.6667	146.136	201.493	175.517	-0.09607	3.62187	3.04823	1.99414	0.485479
GSOR310210	japonica	TEJ	KRASNODARSKIJ 424	Russian Federation	6	6.66667	6.93333	63.75	62	78.1667	88	151.073	189.071	172.064	-0.144129	3.57956	3.04543	2.0491	0.587524
GSOR310241	japonica	TEJ	UZ ROSZ M38	Uzbekistan	4	4.125	4.6625	58.5	60	68.6667	82	133.217	198.584	168.106	-0.205101	3.60527	3.06189	2.05216	0.577261
GSOR310301	japonica	TEJ	H57-3-1	Argentina	4	4.125	4.6625	82.25	78	84.5	92	210.462	224.777	216.508	-0.0827226	3.58154	3.02222	2.10059	0.506356
GSOR310345	japonica	TEJ	J.P. 5	Australia				95.3333	96	107	94	189.654	199.461	194.99	0.0092414	3.59373	3.04319	2.11992	0.446244
GSOR310510	japonica	TEJ	BLUE STICK	Fiji	7	3.25	5.725	117.75	111	105.5	106	208.528	157.577	184.393	0.0534693	3.59943	2.94704	2.08332	0.48506
GSOR310723	japonica	TEJ	WIR 3039	Tajikistan								170.916	194.543	183.915
GSOR310767	japonica	TEJ	HB-6-2	Hungary	7	6.25	7.225	62.25	61	68	65.6667	156.481	202.001	183.626	-0.181084	3.60015	3.05606	2.0036	0.523948
GSOR310802	japonica	TEJ	Tamanishiki	Japan	4	4.125	4.6625	105	104	77.5	66	165.015	167.159	168.429	0.0603134	3.5793	3.00241	2.17268	0.457493
GSOR310809	japonica	TEJ	Yong Chal Byo	Korea_ South	7	4.875	6.5375	82.25	83	107	142	174.139	199.877	187.904	-0.066691	3.59269	3.03643	2.0793	0.474454
GSOR310861	japonica	TEJ	Niwahutaw Mochi	Japan	3	2.75	3.475	92.25	89	73	76	190.349	187.94	189.965	0.034974	3.61345	2.92086	2.01668	0.508089
GSOR310879	japonica	TEJ	6360	Turkey	7	5.25	6.725	80.5	71	87.5	83.6667	158.579	180.348	171.535	-0.128657	3.59648	3.00049	2.11724	0.48598
GSOR310883	japonica	TEJ	Somewake	Japan	2.5	3	3.35	73.25	70	90.3333	94	184.84	213.153	199.09	-0.0254626	3.59761	3.05405	2.05264	0.603453
GSOR310906	japonica	TEJ	Ardito	Italy	5.5	4.375	5.5375	76	71	85	85.6667	207.678	232.433	218.758	-0.130657	3.51731	3.03777	1.99196	0.539703
GSOR310965	japonica	TEJ	Vary Tarva Osla	Portugal	4.5	3	4.35	82.75	76	82	91.3333	233.67	253.629	240.795	-0.163235	3.56461	3.05195	2.02447	0.495934
GSOR310984	japonica	TEJ	CSORNUJ	Hungary	7	6	7.1	51.25	50	69	72.3333	178.349	196.991	188.539	-0.0899611	3.59234	3.04383	2.03028	0.502773
GSOR310997	japonica	TEJ	LUSITANO	Portugal	4	3.75	4.475	57.75	60	73.8333	80.6667	189.795	201.655	196.075	-0.220318	3.5836	3.03949	2.06557	0.560388
GSOR311185	japonica	TEJ	Bombon	Spain	6.5	5.5	6.6	83.5	85	95	97	192.94	216.017	204.22	-0.0504245	3.56204	3.06492	2.1876	0.439523
GSOR311393	japonica	TEJ	Celiaj	Azerbaijan	6.5	5.625	6.6625	73.5	70	96.5	105	173.654	203.017	189.135	-0.248566	3.56864	3.05548	2.092	0.552267
GSOR311497	japonica	TEJ	CHUNJIANGZAO NO. 1	China		5.5	4.35	78.75	63	57	58	161.196	221.72	196.812	-0.229951	3.58252	3.05312	2.12947	0.636661
GSOR311532	japonica	TEJ	Egyptian Wild Type	Turkey								159.794	179.073	171.513	0.002801	3.59245	3.05355	2.07931	0.47403
GSOR311537	japonica	TEJ	A 5	Japan											-0.265445	3.58496	3.05219	2.00026	0.541525
GSOR311620	japonica	TEJ	Romeno	Portugal								157.331	216.548	187.76	-0.150638	3.59099	3.04627	2.12395	0.489157
GSOR311677	japonica	TEJ	Karabaschak	Bulgaria								163.899	196.898	181.717	-0.21945	3.59792	3.04093	2.0409	0.503392
GSOR311685	japonica	TEJ	WIR 911	Russian Federation											-0.461788	3.57754	3.02533	2.03557	0.523812
GSOR311787	japonica	TEJ	KRASNODARSKIJ 3352	Russian Federation	5	5.125	5.6625	58.5	59	76	83	173.014	192.581	183.988	-0.0465957	3.5973	3.05342	2.00625	0.589109
GSOR311794	japonica	TEJ	M202	United States								180.946	217.254	199.167
GSOR311383		TEJ/ARO	DARMALI	Nepal	5.5	5.75	6.225	111	107	134	156	159.543	183.945	173.658	0.0093412	3.60281	3.04864	2.01595	0.522346
GSOR310023	japonica	TEJ/TRJ	RD 218	Dominican Republic	5	3.75	4.975	109.5	110	124.5	137				-0.0167161	3.58491	3.07766	2.11451	0.533252
GSOR310039	japonica	TEJ/TRJ	C 5560	Thailand	7.5	2.75	5.725	96.75	90	91.5	110				-0.0028492	3.58639	3.04251	2.02308	0.443331
GSOR310156	japonica	TEJ/TRJ	Sel. No. 388	Uruguay	3	2.625	3.4125	88	88	107.5	119	215.989	245.825	228.876	-0.0004468	3.5904	3.05701	2.16576	0.541855
GSOR310337	japonica	TEJ/TRJ	Khao Phoi	Laos	7.5	5.5	7.1	99	99	95	104	158.003	173.993	168.314	-0.0672224	3.59671	3.07236	2.03294	0.43746
GSOR310702	japonica	TEJ/TRJ	Jumli dhan	Nepal	6	6.625	6.9125	106.5	108	152	164	173.357	181.904	179.191	0.0341968	3.58884	3.03718	2.12195	0.371379
GSOR310747	japonica	TEJ/TRJ	BHIM DHAN	Nepal	7	3.75	5.975	95	93	112.5	125	182.262	182.366	183.583	0.0915977	3.57976	3.05237	2.07666	0.417473
GSOR310799	japonica	TEJ/TRJ	Ragasu	Taiwan	7.5	6.33333	7.51667	82.25	84	79.5	89	183.387	199.6	192.114	0.0428817	3.59474	3.02698	2.11407	0.545895
GSOR310887	japonica	TEJ/TRJ	Buphopa	Myanmar	5.5	3.875	5.2875	109.5	109	97	91	185.508	185.409	186.519	0.0483438	3.57085	3.08502	2.06036	0.427706
GSOR311600	japonica	TEJ/TRJ	Jyanak	Bhutan	5.5	6.5	6.6	118	110	136	142	180.319	157.554	171.149	0.0834312	3.5991	3.02274	2.09568	0.425803
GSOR310007	japonica	TRJ	Karang Serang	Indonesia	8	4.125	6.6625	101.5	99	115.5	134				0.0745643	3.59003	3.08064	2.03161	0.441085
GSOR310020	japonica	TRJ	E B Gopher	United States	7	4.75	6.475	95.25	94	91.5	98				-0.0380846	3.60729	3.06304	2.0569	0.469589
GSOR310045	japonica	TRJ	LEAH	United States	6.5	2.5	5.1	85.5	83	71.5	74				-0.149465	3.57163	3.04304	2.04624	0.515209
GSOR310052	japonica	TRJ	Quinimpol	Philippines	7.5	4.5	6.6	102.75	101	95	100				-0.0538115	3.59615	3.07019	2.05065	0.558727
GSOR310087	japonica	TRJ	WC 2811	Micronesia	7	4	6.1	91	85	113	112	202.119	228.231	214.198	0.0078124	3.57841	3.073	2.04162	0.495036
GSOR310102	japonica	TRJ	Criollo Chivacoa 2	Venezuela	6.5	4.875	6.2875	99.25	100	99	96	230.045	238.483	232.06	0.0609273	3.61701	3.06991	2.09853	0.45212
GSOR310131	japonica	TRJ	Secano do Brazil	El Salvador	6.5	4.5	6.1	90.5	89	104.5	122	240.202	239.129	237.126	0.123852	3.57935	3.06646	2.12513	0.421096
GSOR310144	japonica	TRJ	British Honduras Creole	Belize	8	7	8.1	92.5	89	106.5	118	198.106	218.556	207.823	0.0746567	3.58624	3.03804	2.12266	0.492174
GSOR310238	japonica	TRJ	R 75	Senegal	7	2.75	5.475	91.75	91	85.5	81	205.351	225.83	214.599	-0.0297593	3.59102	3.05745	2.10579	0.500552
GSOR310348	japonica	TRJ	C 8429	Papua New Guinea	5	3.25	4.725	101	100	110.5	138	235.672	250.028	240.062	-0.0531893	3.5946	3.06724	2.09228	0.439916
GSOR310354	japonica	TRJ	Padi Pohon Batu	Malaysia	7	4	6.1	92.5	88	103.5	108.222	229.73	259.194	241.531	-0.113737	3.60673	3.05687	2.08539	0.526542
GSOR310428	japonica	TRJ	Sipirasikkam	Indonesia	7	5.33333	6.76667	99.75	97	109.5	114.222	216.107	219.111	216.525	-0.568475	3.57094	3.08817	2.09279	0.477921
GSOR310588	japonica	TRJ	Onu B	Zaire	3	2.25	2.75	94.5	93	107	139	199.038	247.187	221.556	-0.014216	3.54763	3.06773	2.03986	0.494689
GSOR310645	japonica	TRJ	MOROBEREKAN	Guinea	8.5	6.75	8.225	113.5	104	92	98	226.246	212.484	218.204	0.0851907	3.55724	3.06924	2.12428	0.525293
GSOR310777	japonica	TRJ	WC 3532	Peru	6	4.375	5.7875	89.75	84	87.5	116	208.167	237.213	221.207	-0.0195395	3.5948	3.05155	2.08119	0.519564
GSOR310779	japonica	TRJ	GPNO 1106	Guatemala	8.5	6.66667	8.18333	92	89	102	121	194.755	201.101	198.144	0.0996012	3.58167	3.06275	2.04458	0.476536
GSOR310814	japonica	TRJ	Grassy	Haiti	8.5	5.66346	7.85	92.75	88	119	150	187.889	228.393	207.597	0.182008	3.57822	3.06839	2.03147	0.445484
GSOR310998	japonica	TRJ	WC 4443	Bolivia	6.5	4.75	6.225	96.75	93	90	103	212.048	213.615	212.069	0.0459889	3.59569	3.07206	2.02314	0.563586
GSOR311074	japonica	TRJ	Mitak	Indonesia								219.815	263.258	238.766	0.0508229	3.59692	3.05663	2.10572	0.526089
GSOR311258	japonica	TRJ	Botika S/R	Zaire	7.5	5.875	7.2875	96.25	95	119.5	148	183.537	251.113	216.107	-0.0730806	3.57092	3.06803	2.16907	0.473538
GSOR311385	japonica	TRJ	KAUKKYI ANI	Myanmar	5.5	3.125	4.9125	122.75	124	93	107				-0.0571867	3.57585	3.06054	2.0568	0.529043
GSOR311642	japonica	TRJ	Tia Bura	Indonesia								193.576	241.877	216.527	0.0044279	3.59326	3.05077	2.07854	0.453977
GSOR311643	japonica	TRJ	Padi Tarab Arab	Malaysia								167.474	219.688	193.977	0.0506722	3.59971	3.06204	2.06903	0.403337
GSOR311735	japonica	TRJ	Simpor	Brunei	4.5	3.75	4.725	109.75	110	99	107				0.11764	3.58366	3.07883	2.15378	0.417178
GSOR311736	japonica	TRJ	Coppocina	Bulgaria	8.5	6.16667	7.93333	103.5	101	99	128	217.09	229.616	221.865	-0.103502	3.59532	3.06246	2.06628	0.468489
GSOR311779	japonica	TRJ	WC 10253	Uncertain	7	4.875	6.5375	88.75	82	132	144				0.0285227	3.59321	3.05069	2.05589	0.533987
GSOR311788	japonica	TRJ	EMBRAPA 1200	Brazil	6	5.66667	6.43333	89.5	84	57	65	185.893	230.309	209.897	-0.24853	3.58603	3.08996	1.98697	0.523768
GSOR311790	japonica	TRJ	WAB462-10-3-1	Cote D'Ivoire	6.5	6.5	7.1	83.25	82	57.5	74	197.397	246.656	220.54	-0.224837	3.55438	3.06935	2.02328	0.577005
GSOR310338		TRJ/(admix)	Khao Luang	Laos	6.5	6.66667	7.18333	108.5	89	98	138	169.376	171.338	172.416	0.0133165	3.61142	3.07471	2.0074	0.503212
GSOR310950		TRJ/(admix)	NANTON NO. 131	Taiwan				123	127	109	119	174.628	169.565	174.057	-0.0413385	3.59021	3.08015	2.08617	0.451541
